# Supplementary material for: Evolutionary Patterns of the Chloroplast Genome in Vanilloid Orchids (Vanilloideae, Orchidaceae)
Source: MDPI journal article supplement (doi:10.3390/ijms24043808), 2023-02-14
Supplement: s1 [file s1]

Supplementary Tables S1-S3.

Table S1. The NGS results of six newly decoded Vanilloideae species.

| <b>Scientific Name</b>          | <b>NGS Method</b> | <b># of raw reads</b> | <b># of trimmed reads</b> | <b>Coverage</b> | <b>Voucher specimen and/or DNA number</b> |
|---------------------------------|-------------------|-----------------------|---------------------------|-----------------|-------------------------------------------|
| <i>Lecanorchis japonica</i>     | MiSeq             | 10,228,582            | 9,994,252                 | 76.9            | PDBK2018-0250                             |
| <i>Lecanorchis kiusiana</i>     | MiSeq             | 9,688,246             | 9,458,470                 | 128.9           | PDBK2018-0249                             |
| <i>Pogonia japonica</i>         | MiSeq             | 21,314,324            | 21,084,838                | 464.6           | PDBK2015-1272                             |
| <i>Pogonia minor</i>            | MiSeq             | 9,508,082             | 9,378,346                 | 563.2           | PDBK2011-1673                             |
| <i>Vanilla madagascariensis</i> | HiSeq             | 64,556,822            | 64,556,822                | 4394            | PDBKTMA2013-1861                          |
| <i>Vanilla planifolia</i>       | HiSeq             | 16,568,124            | 16,568,124                | 592             | PDBKTMA2013-1860                          |

Table S2. Log-likelihood ratio (LRT) test result among eight regions under position effect and twenty remaining regions in mycoheterotrophic species. Regions with significant p-values (p-value < 0.05) are highlighted in red color.

| Category         | Region          | p-value     |
|------------------|-----------------|-------------|
| Position effect  | <i>ccsA</i>     | 0.48814321  |
| Position effect  | <i>rpl2</i>     | 0.032521691 |
| Position effect  | <i>rpl22</i>    | 0.990540247 |
| Position effect  | <i>rps12 3'</i> | 0.21771596  |
| Position effect  | <i>rps15</i>    | 0.075109711 |
| Position effect  | <i>rps19</i>    | 0.982254224 |
| Position effect  | <i>rps7</i>     | 0.998829689 |
| Position effect  | <i>ycf1</i>     | 7.57649E-11 |
| Mycoheterotrophy | <i>clpP</i>     | 0.019750885 |
| Mycoheterotrophy | <i>infA</i>     | 0.03997608  |
| Mycoheterotrophy | <i>matK</i>     | 0.395834929 |
| Mycoheterotrophy | <i>rpl2</i>     | 0.233440934 |
| Mycoheterotrophy | <i>rpl14</i>    | 0.99721688  |
| Mycoheterotrophy | <i>rpl16</i>    | 0.197039906 |
| Mycoheterotrophy | <i>rpl20</i>    | 0.684008455 |
| Mycoheterotrophy | <i>rpl36</i>    | 0.188353267 |
| Mycoheterotrophy | <i>rps2</i>     | 0.250458761 |
| Mycoheterotrophy | <i>rps3</i>     | 0.003294773 |
| Mycoheterotrophy | <i>rps4</i>     | 0.778982265 |
| Mycoheterotrophy | <i>rps7</i>     | 0.169622992 |
| Mycoheterotrophy | <i>rps8</i>     | 0.357812562 |
| Mycoheterotrophy | <i>rps11</i>    | 0.440046445 |
| Mycoheterotrophy | <i>rps14</i>    | 0.152648254 |
| Mycoheterotrophy | <i>rps18</i>    | 0.000922093 |
| Mycoheterotrophy | <i>rps19</i>    | 0.881219091 |
| Mycoheterotrophy | <i>rps12 5'</i> | 0.157522811 |
| Mycoheterotrophy | <i>rps12 3'</i> | 0.287089548 |
| Mycoheterotrophy | <i>ycf2</i>     | 0.090170767 |

1 Table S3. Used sequence information in this study. Red scientific name indicates that the species' NGS data was generated in this study.

| Scientific Name                                          | NCBI<br>Accession<br>Number<br>(Plastome) | Length<br>(bp) | LSC<br>(bp) | SSC<br>(bp) | IR<br>(bp) | GC<br>(%) | Coverage<br>(x) | Subfamily      | Tribe       |
|----------------------------------------------------------|-------------------------------------------|----------------|-------------|-------------|------------|-----------|-----------------|----------------|-------------|
| <i>Bletilla ochracea</i>                                 | NC029483                                  | 157,431        | 85,810      | 17,949      | 26,836     | 37.3      | -               | Epidendroideae | Arethuseae  |
| <i>Bletilla striata</i>                                  | NC028422                                  | 157,393        | 86,213      | 17,742      | 26,719     | 37.2      | -               | Epidendroideae | Arethuseae  |
| <i>Calanthe davidii</i>                                  | NC037438                                  | 153,629        | 86,045      | 15,672      | 25,956     | 36.9      | -               | Epidendroideae | Collabieae  |
| <i>Calanthe triplicata</i>                               | NC024544                                  | 158,759        | 87,305      | 18,460      | 26,497     | 36.7      | -               | Epidendroideae | Collabieae  |
| <i>Cymbidium lancifolium</i>                             | NC029712                                  | 149,945        | 84,716      | 13,895      | 25,667     | 37.1      | -               | Epidendroideae | Cymbidieae  |
| <i>Cymbidium macrorhizon</i>                             | KY354040                                  | 149,859        | 85,187      | 13,766      | 25,453     | 37        | -               | Epidendroideae | Cymbidieae  |
| <i>Cymbidium sinense</i>                                 | NC021430                                  | 155,548        | 84,920      | 17,666      | 26,481     | 37        | -               | Epidendroideae | Cymbidieae  |
| <i>Erycina pusilla</i>                                   | NC018114                                  | 143,164        | 83,733      | 11,675      | 23,878     | 36.7      | -               | Epidendroideae | Cymbidieae  |
| <i>Eulophia zollingeri</i>                               | NC037212                                  | 145,201        | 81,566      | 13,091      | 25,272     | 36.9      | -               | Epidendroideae | Cymbidieae  |
| <i>Oncidium sphacelatum</i>                              | NC028148                                  | 147,761        | 83,575      | 12,670      | 25,758     | 37.1      | -               | Epidendroideae | Cymbidieae  |
| <i>Cattleya crispata</i>                                 | NC026568                                  | 148,343        | 85,973      | 13,261      | 24,495     | 37.3      | -               | Epidendroideae | Epidendreae |
| <i>Cattleya liliputana</i>                               | NC032083                                  | 147,092        | 85,945      | 13,149      | 24,304     | 37.4      | -               | Epidendroideae | Epidendreae |
| <i>Corallorhiza bulbosa</i>                              | NC025659                                  | 148,643        | 82,851      | 12,368      | 26,712     | 37.1      | -               | Epidendroideae | Epidendreae |
| <i>Corallorhiza macrantha</i>                            | NC025660                                  | 151,031        | 84,263      | 12,544      | 27,112     | 37.2      | -               | Epidendroideae | Epidendreae |
| <i>Corallorhiza maculata</i> var.<br><i>maculata</i>     | KM390014                                  | 146,886        | 80,395      | 12,885      | 26,803     | 36.8      | -               | Epidendroideae | Epidendreae |
| <i>Corallorhiza maculata</i> var.<br><i>mexicana</i>     | KM390015                                  | 151,506        | 84,347      | 12,671      | 27,244     | 37.1      | -               | Epidendroideae | Epidendreae |
| <i>Corallorhiza maculata</i> var.<br><i>occidentalis</i> | KM390016                                  | 146,595        | 81,363      | 12,368      | 26,432     | 36.9      | -               | Epidendroideae | Epidendreae |
| <i>Corallorhiza mertensiana</i>                          | NC025661                                  | 147,941        | 81,109      | 13,774      | 26,529     | 36.8      | -               | Epidendroideae | Epidendreae |
| <i>Corallorhiza odontorhiza</i>                          | NC025664                                  | 147,317        | 82,257      | 13,508      | 25,776     | 37        | -               | Epidendroideae | Epidendreae |

|                                                    |          |         |           |           |        |      |   |                |             |
|----------------------------------------------------|----------|---------|-----------|-----------|--------|------|---|----------------|-------------|
| <i>Corallorhiza striata</i> var. <i>vreelandii</i> | JX087681 | 137,505 | 72,631    | 12,388    | 26,243 | 36.4 | - | Epidendroideae | Epidendreae |
| <i>Corallorhiza trifida</i>                        | NC025662 | 149,384 | 83,092    | 14,420    | 25,936 | 37.2 | - | Epidendroideae | Epidendreae |
| <i>Corallorhiza wisteriana</i>                     | NC025663 | 146,437 | 76,350    | 17,743    | 26,172 | 37.1 | - | Epidendroideae | Epidendreae |
| <i>Masdevallia coccinea</i>                        | NC026541 | 157,423 | 84,957    | 18,448    | 27,009 | 36.8 | - | Epidendroideae | Epidendreae |
| <i>Masdevallia picturata</i>                       | NC026777 | 156,045 | 84,948    | 18,029    | 26,534 | 36.9 | - | Epidendroideae | Epidendreae |
| <i>Gastrodia elata</i>                             | NC037409 | 35,304  | (SC Only) | (SC Only) | -      | 34.2 | - | Epidendroideae | Gastrodieae |
| <i>Dendrobium nobile</i>                           | NC029456 | 153,660 | 85,686    | 14,654    | 26,660 | 37.5 | - | Epidendroideae | Malaxideae  |
| <i>Dendrobium officinale</i>                       | NC024019 | 152,221 | 85,109    | 14,516    | 26,298 | 37.5 | - | Epidendroideae | Malaxideae  |
| <i>Oberonia japonica</i>                           | NC035832 | 142,996 | 81,669    | 10,969    | 25,179 | 37.4 | - | Epidendroideae | Malaxideae  |
| <i>Aphyllorchis montana</i>                        | NC030703 | 94,559  | (SC Only) | (SC Only) | -      | 37.1 | - | Epidendroideae | Neottieae   |
| <i>Cephalanthera humilis</i>                       | NC030706 | 157,011 | 86,908    | 15,133    | 27,485 | 37.3 | - | Epidendroideae | Neottieae   |
| <i>Cephalanthera longifolia</i>                    | NC030704 | 161,877 | 88,806    | 19,187    | 26,942 | 37.2 | - | Epidendroideae | Neottieae   |
| <i>Epipactis mairei</i>                            | NC030705 | 159,019 | 86,377    | 18,816    | 26,913 | 37.3 | - | Epidendroideae | Neottieae   |
| <i>Epipactis veratrifolia</i>                      | NC030708 | 159,719 | 87,043    | 18,854    | 26,911 | 37.3 | - | Epidendroideae | Neottieae   |
| <i>Neottia acuminata</i>                           | NC030709 | 83,190  | 51,145    | 5,371     | 13,337 | 36.6 | - | Epidendroideae | Neottieae   |
| <i>Neottia camtschatea</i>                         | NC030707 | 106,385 | 52,960    | 9,273     | 22,076 | 37.2 | - | Epidendroideae | Neottieae   |
| <i>Neottia fugongensis</i>                         | NC030711 | 156,536 | 85,357    | 18,311    | 26,434 | 31.6 | - | Epidendroideae | Neottieae   |
| <i>Neottia listeroides</i>                         | NC030713 | 110,246 | 45,021    | 9,597     | 27,814 | 37.2 | - | Epidendroideae | Neottieae   |
| <i>Neottia nidus-avis</i>                          | NC016471 | 92,060  | 36,422    | 7,822     | 23,908 | 34.4 | - | Epidendroideae | Neottieae   |
| <i>Neottia ovata</i>                               | NC030712 | 156,978 | 85,433    | 18,071    | 26,737 | 37.6 | - | Epidendroideae | Neottieae   |
| <i>Neottia pinetorum</i>                           | NC030710 | 155,959 | 84,449    | 18,104    | 26,703 | 37.5 | - | Epidendroideae | Neottieae   |
| <i>Epipogium aphyllum</i>                          | NC026449 | 30,650  | 8,030     | -         | 11,310 | 32.8 | - | Epidendroideae | Nervilieae  |
| <i>Epipogium roseum</i>                            | NC026448 | 19,047  | 9,618     | 8,907     | 261    | 30.6 | - | Epidendroideae | Nervilieae  |
| <i>Elleanthus sodiroi</i>                          | NC027266 | 161,511 | 88,425    | 18,880    | 27,103 | 37.1 | - | Epidendroideae | Sobralieae  |

|                                                          |          |         |         |        |        |      |   |                 |                 |
|----------------------------------------------------------|----------|---------|---------|--------|--------|------|---|-----------------|-----------------|
| <i>Sobralia callosa</i>                                  | NC028147 | 161,430 | 88,666  | 18,794 | 26,985 | 37.1 | - | Epidendroideae  | Sobralieae      |
| <i>Gastrochilus fuscopunctatus</i>                       | KX871233 | 146,183 | 83,125  | 11,146 | 25,956 | 36.8 | - | Epidendroideae  | Vandaeae        |
| <i>Gastrochilus japonicus</i>                            | KX871236 | 147,697 | 84,695  | 11,174 | 25,914 | 36.8 | - | Epidendroideae  | Vandaeae        |
| <i>Neofinetia cultivar</i>                               | KT726907 | 146,497 | 83,808  | 11,775 | 25,457 | 36.6 | - | Epidendroideae  | Vandaeae        |
| <i>Neofinetia falcata</i>                                | KT726909 | 146,491 | 83,802  | 11,775 | 25,457 | 36.6 | - | Epidendroideae  | Vandaeae        |
| <i>Neofinetia richardsiana</i>                           | KT726908 | 146,498 | 83,809  | 11,775 | 25,457 | 36.6 | - | Epidendroideae  | Vandaeae        |
| <i>Pelatantheria scolopendrifolia</i>                    | KX871232 | 146,860 | 86,075  | 11,735 | 24,525 | 36.5 | - | Epidendroideae  | Vandaeae        |
| <i>Phalaenopsis aphrodite</i> subsp.<br><i>formosana</i> | AY916449 | 148,964 | 85,957  | 11,543 | 25,732 | 36.7 | - | Epidendroideae  | Vandaeae        |
| <i>Phalaenopsis equestris</i>                            | JF719062 | 148,959 | 85,967  | 11,300 | 25,846 | 36.7 | - | Epidendroideae  | Vandaeae        |
| <i>Phalaenopsis</i> hybrid cultivar                      | KJ944326 | 148,918 | 85,885  | 11,523 | 25,755 | 36.7 | - | Epidendroideae  | Vandaeae        |
| <i>Phalaenopsis pulcherrima</i>                          | MG459020 | 149,272 | 85,749  | 11,653 | 25,935 | 36.8 | - | Epidendroideae  | Vandaeae        |
| <i>Thrixspermum japonicum</i>                            | KX871234 | 149,220 | 85,301  | 11,546 | 26,187 | 36.1 | - | Epidendroideae  | Vandaeae        |
| <i>Goodyera fumata</i>                                   | NC026773 | 155,643 | 84,077  | 18,342 | 26,612 | 37.3 | - | Orchidoideae    | Cranichideae    |
| <i>Goodyera procera</i>                                  | NC029363 | 153,240 | 82,032  | 18,406 | 26,401 | 37.6 | - | Orchidoideae    | Cranichideae    |
| <i>Goodyera schlechtendaliana</i>                        | NC029364 | 154,348 | 83,215  | 18,051 | 26,541 | 37.2 | - | Orchidoideae    | Cranichideae    |
| <i>Goodyera velutina</i>                                 | NC029365 | 152,692 | 82,443  | 17,247 | 26,501 | 36.9 | - | Orchidoideae    | Cranichideae    |
| <i>Kuhlhasseltia nakaiana</i>                            | KY354041 | 147,614 | 81,617  | 13,673 | 26,162 | 39.5 | - | Orchidoideae    | Cranichideae    |
| <i>Ludisia discolor</i>                                  | NC030540 | 153,054 | 82,675  | 17,233 | 26,573 | 37   | - | Orchidoideae    | Cranichideae    |
| <i>Rhizanthella gardneri</i>                             | NC014874 | 59,190  | 26,360  | 13,295 | 9,767  | 34.2 | - | Orchidoideae    | Diurideae       |
| <i>Habenaria pantlingiana</i>                            | NC026775 | 153,951 | 83,641  | 17,370 | 26,470 | 36.6 | - | Orchidoideae    | Orchideae       |
| <i>Habenaria radiata</i>                                 | NC035834 | 155,353 | 84,833  | 17,718 | 26,401 | 36.5 | - | Orchidoideae    | Orchideae       |
| <i>Cypripedium formosanum</i>                            | NC026772 | 178,131 | 102,188 | 21,921 | 27,011 | 33.9 | - | Cypripedioideae | Cypripedioideae |
| <i>Cypripedium japonicum</i>                             | NC027227 | 174,417 | 97,322  | 21,911 | 27,592 | 34.5 | - | Cypripedioideae | Cypripedioideae |
| <i>Paphiopedilum armeniacum</i>                          | NC026779 | 162,682 | 91,734  | 3,666  | 33,641 | 35.4 | - | Cypripedioideae | Cypripedioideae |
| <i>Paphiopedilum dianthum</i>                            | NC036958 | 154,699 | 86,861  | 2,416  | 32,711 | 35.9 | - | Cypripedioideae | Cypripedioideae |

|                                                         |          |         |        |        |        |      |         |                             |                             |
|---------------------------------------------------------|----------|---------|--------|--------|--------|------|---------|-----------------------------|-----------------------------|
| <i>Paphiopedilum niveum</i>                             | NC026776 | 159,108 | 89,856 | 5,194  | 32,029 | 35.7 | -       | Cypripedioideae             | Cypripedioideae             |
| <i>Phragmipedium longifolium</i>                        | NC028149 | 151,157 | 88,367 | 13,066 | 24,862 | 36.1 | -       | Cypripedioideae             | Cypripedioideae             |
| <i>Pogonia japonica</i>                                 | MN200371 | 158,200 | 87,447 | 5,387  | 32,683 | 36.4 | 464.6   | Vanilloideae                | Pogonieae                   |
| <i>Pogonia minor</i>                                    | MN200372 | 158,170 | 87,457 | 5,375  | 32,669 | 36.4 | 563.2   | Vanilloideae                | Pogonieae                   |
| <i>Cyrtosia septentrionalis</i>                         | MH615835 | 96,859  | 58,085 | 10,414 | 17,946 | 34.8 | -       | Vanilloideae                | Vanilleae                   |
| <i>Lecanorchis japonica</i>                             | MN200364 | 70,498  | 28,197 | 14,493 | 13,904 | 30.4 | 76.9    | Vanilloideae                | Vanilleae                   |
| <i>Lecanorchis kiusiana</i>                             | MN200363 | 74,084  | 30,824 | 14,118 | 14,571 | 30   | 128.9   | Vanilloideae                | Vanilleae                   |
| <i>Vanilla aphylla</i>                                  | NC035320 | 150,184 | 87,379 | 2,131  | 30,337 | 35   | -       | Vanilloideae                | Vanilleae                   |
| <i>Vanilla madagascariensis</i>                         | MN200374 | 151,552 | 87,490 | 1,254  | 31,404 | 34.6 | 4,394.0 | Vanilloideae                | Vanilleae                   |
| <i>Vanilla planifolia</i> 1                             | MN200375 | 147,714 | 86,061 | 2,037  | 29,808 | 35.4 | 592.0   | Vanilloideae                | Vanilleae                   |
| <i>Vanilla planifolia</i> 2                             | NC026778 | 148,011 | 86,358 | 2,037  | 29,808 | 35.4 | -       | Vanilloideae                | Vanilleae                   |
| <i>Vanilla pompona</i>                                  | NC036809 | 148,009 | 86,358 | 2,037  | 29,807 | 35.4 | -       | Vanilloideae                | Vanilleae                   |
| <i>Apostasia odorata</i>                                | NC030722 | 159,285 | 86,172 | 18,765 | 27,174 | 35.7 | -       | Apostasioideae              | Apostasioideae              |
| <i>Apostasia wallichii</i>                              | NC036260 | 156,126 | 83,031 | 20,187 | 26,454 | 36.1 | -       | Apostasioideae              | Apostasioideae              |
| <i>Neuwiedia singapureana</i>                           | KM244735 | 162,174 | 89,657 | 18,399 | 27,059 | 35.8 | -       | Apostasioideae              | Apostasioideae              |
| <i>Neuwiedia zollingeri</i> var.<br><i>singapureana</i> | LC199503 | 161,068 | 88,910 | 18,056 | 27,051 | 36   | -       | Apostasioideae              | Apostasioideae              |
| <i>Allium cepa</i>                                      | KM088013 | 153,529 | 82,662 | 17,931 | 26,468 | 36.8 | -       | Amarylidaceae<br>(Outgroup) | Amarylidaceae<br>(Outgroup) |
| <i>Eustrephus latifolius</i>                            | NC025305 | 159,736 | 82,403 | 13,607 | 31,863 | 38.1 | -       | Asparagaceae<br>(Outgroup)  | Asparagaceae<br>(Outgroup)  |
| <i>Iris gatesii</i>                                     | NC024936 | 153,441 | 82,702 | 18,371 | 26,184 | 37.9 | -       | Iridaceae<br>(Outgroup)     | Iridaceae<br>(Outgroup)     |
| <i>Iris sanguinea</i>                                   | NC029227 | 152,408 | 82,340 | 18,016 | 26,026 | 38   | -       | Iridaceae<br>(Outgroup)     | Iridaceae<br>(Outgroup)     |
| <i>Fritillaria hupehensis</i>                           | NC024736 | 152,145 | 81,894 | 17,553 | 26,349 | 37   | -       | Liliales<br>(Outgroup)      | Liliales<br>(Outgroup)      |

3  
4  
5  
6  
7  
8  
9  
10  
11  
12  
13  
14  
15  
16  
17  
18

Supplementary Figures S1-S4.

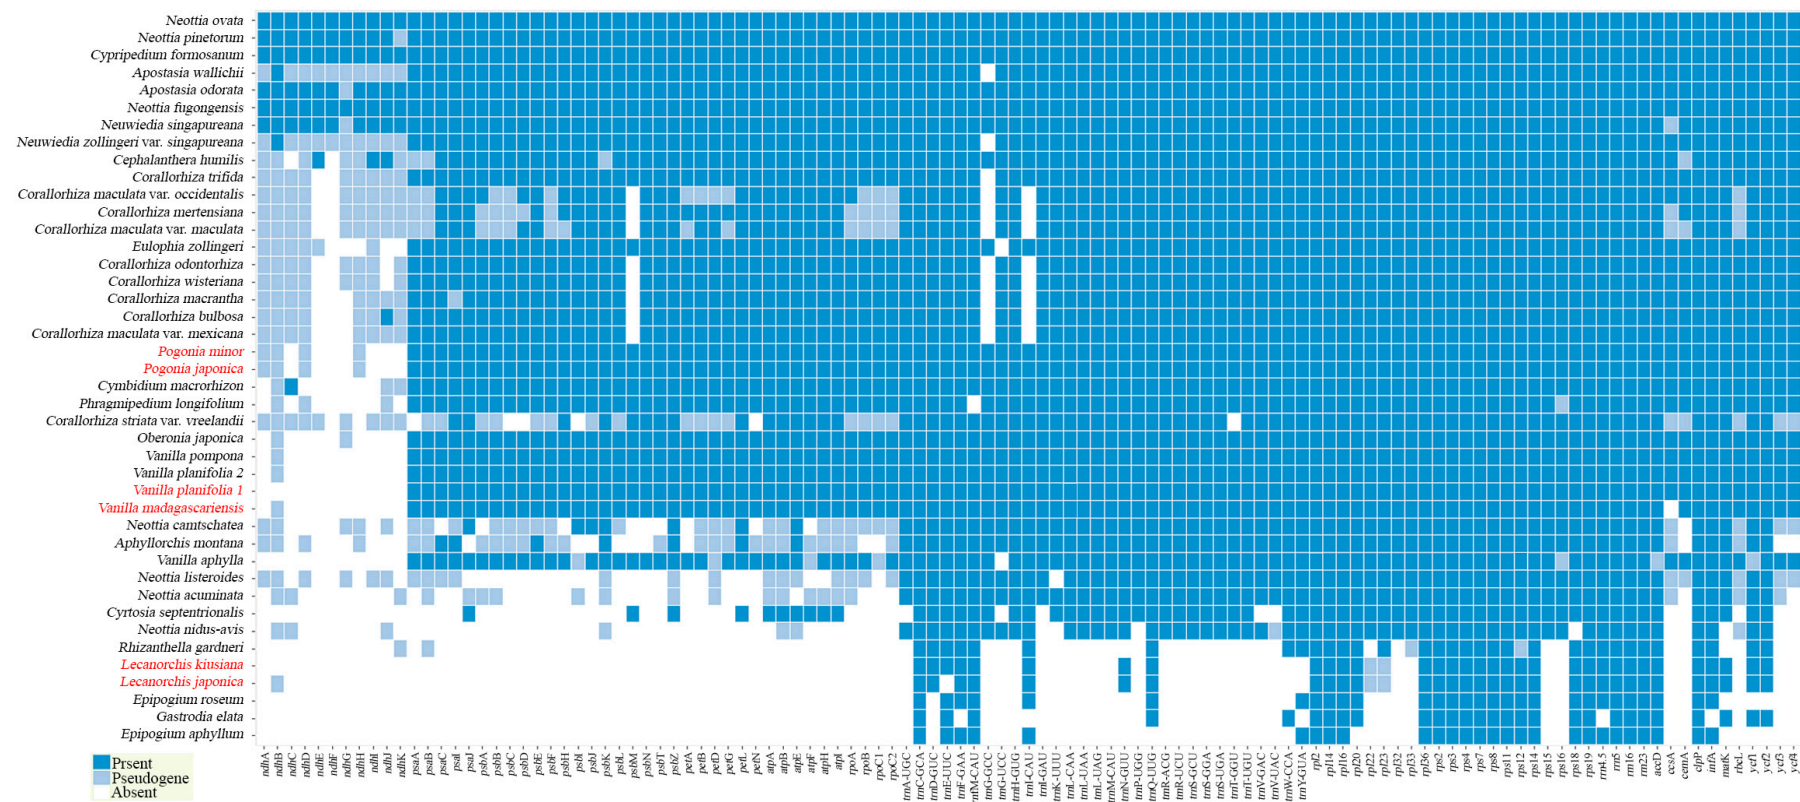

Figure S1. Gene contents heatmap of Orchidaceae, including vanilloid species.



## Inverted Repeats

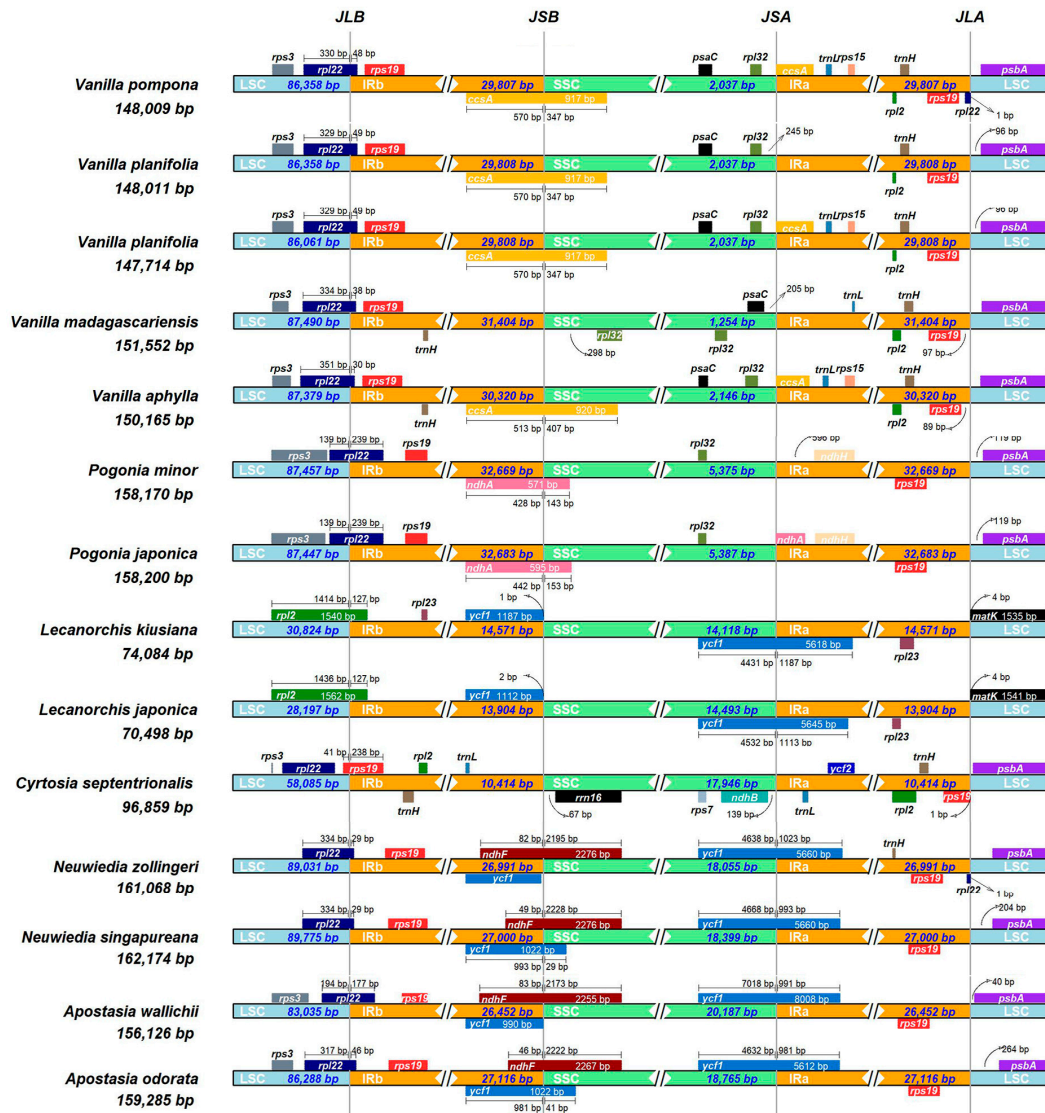

Figure S2. IR junctions of ten *Vanilloideae* and four *Apostasioideae* species.



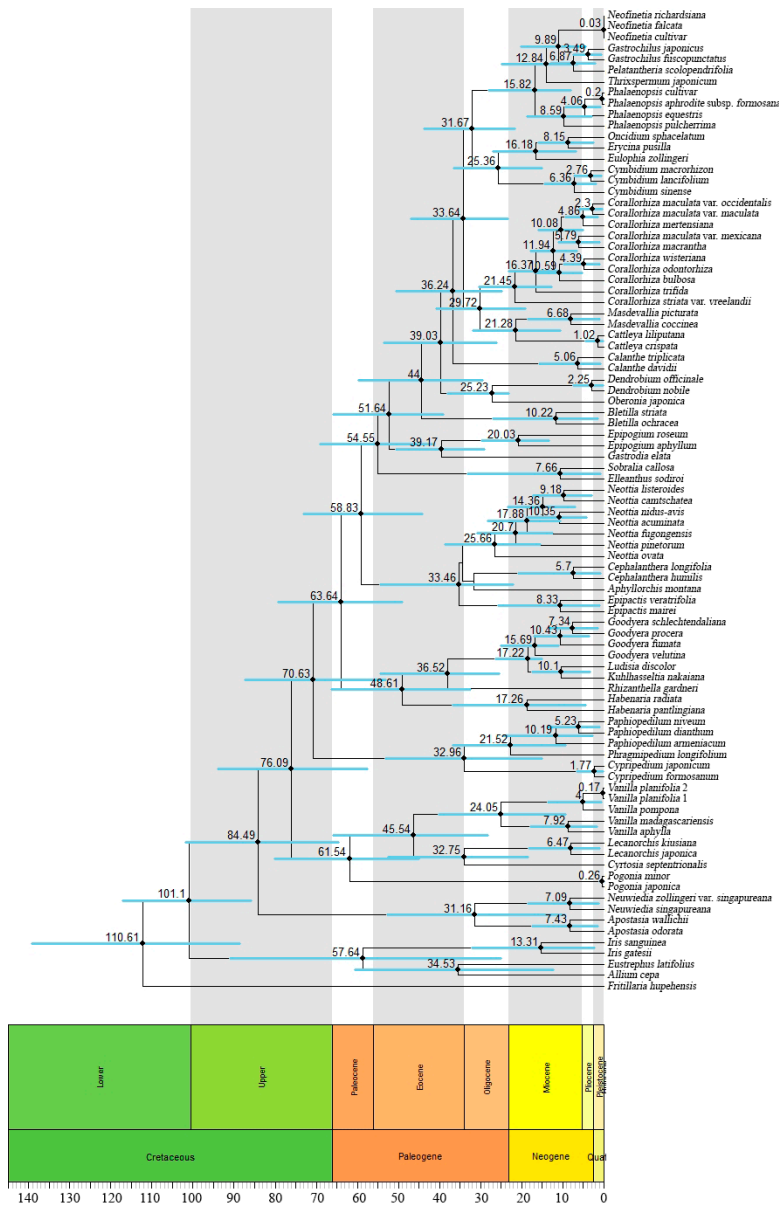

Figure S4. Divergence time estimation of Orchidaceae.
